# Supplementary material for: Self-responsive co-delivery system for remodeling tumor intracellular microenvironment to promote PTEN-mediated anti-tumor therapy
Source: Royal Society of Chemistry journal article supplement (doi:10.1039/d0nr00563k), 2020-01-01
Supplement: d0nr00563k1.pdf [file d0nr00563k1.pdf]

## **Supporting information**

# **Self-responsive Co-delivery System for Remodeling Tumor Intracellular Microenvironment to Promotes PTEN-mediated Antitumor Therapy**

Yifei Wang <sup>a,b,c</sup>, Ruiting Wang <sup>a,b</sup>, Sixuan Wu <sup>a,b</sup>, Jingyi An <sup>a,b</sup>, Yan Liang <sup>a,b</sup>, Lin Hou <sup>a,b,c\*</sup>,

Zhenzhong Zhang <sup>a,b,c\*</sup>

<sup>a</sup> School of Pharmaceutical Sciences, Zhengzhou University, Zhengzhou, China

<sup>b</sup> Key Laboratory of Targeting Therapy and Diagnosis for Critical Diseases, Henan, China

<sup>c</sup> Collaborative Innovation Center of New Drug Research and Safety Evaluation, Henan Province, Zhengzhou, China

\*Corresponding Author: Email address: houlin\_pharm@163.com (Lin Hou), zhangzz\_pharm@163.com (Zhenzhong Zhang)

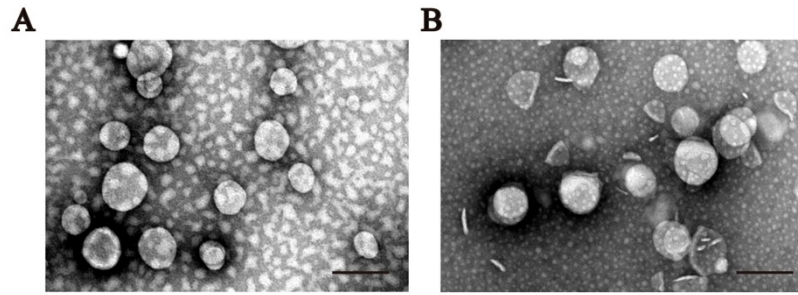

**Figure S1.** Representative TEM image of A) LP, B) LEP, Scale bar: 200 nm.

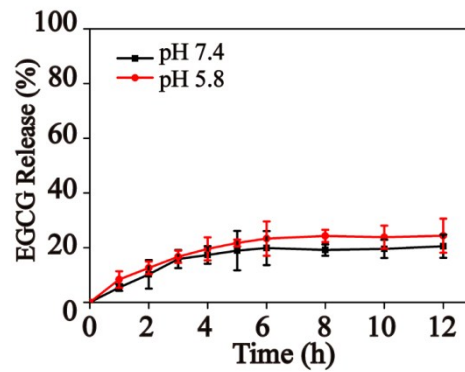

**Figure S2.** The effect of pH on release of EGCG form cationic liposome (n=3)

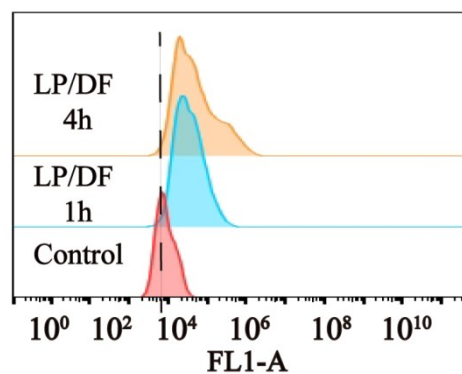

**Figure S3.** Flow cytometry detect of intracellular DNA-FAM after treatment with LP in PC-3.

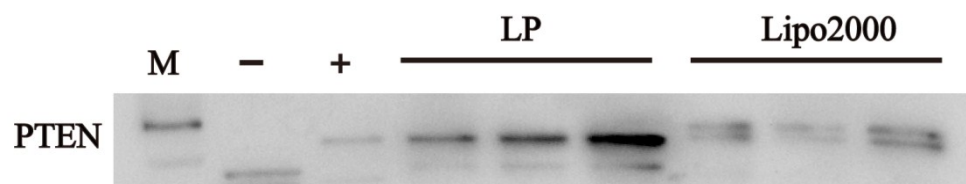

**Figure S4.** Western bot assay analysis of PTEN protein expression in PC-3 cells with LP and Lipo2000.

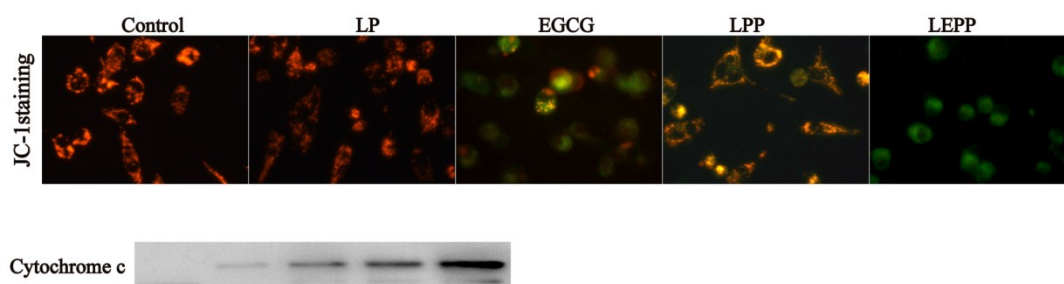

**Figure S5.** Mitochondria membrane potential images (scale bar: 20 $\mu$ m) and Western blotting assays showing the expression level of cytochrome after different treatments.

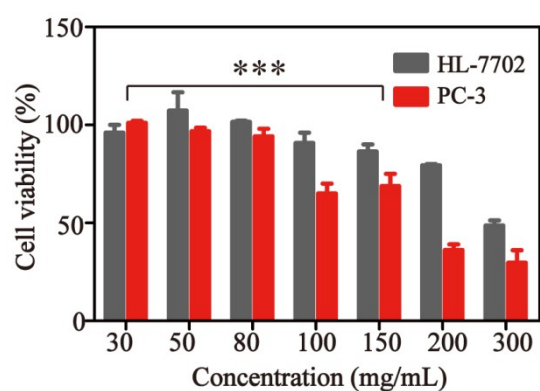

**Figure S6.** Cell viability of HL-7702 cells and PC-3 cells after incubated with LEPP for 24h (n=6).

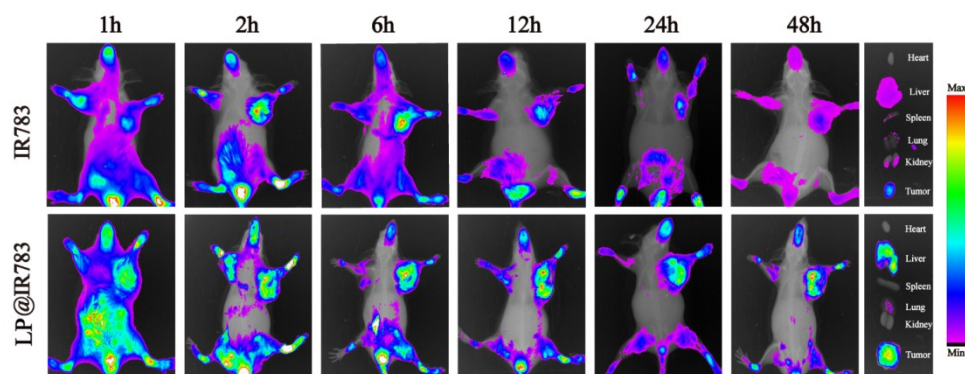

**Figure S7.** Representative fluorescence image *in vivo* optical images.

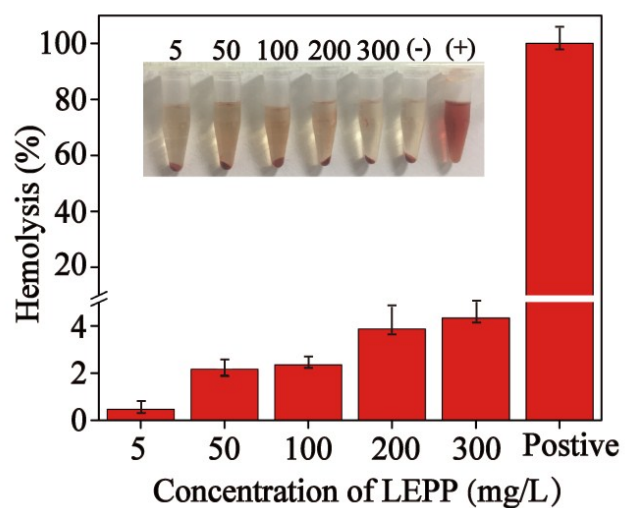

**Figure S8.** Hemolysis quantification analysis of red blood cells at various concentrations of LEPP (n=3).

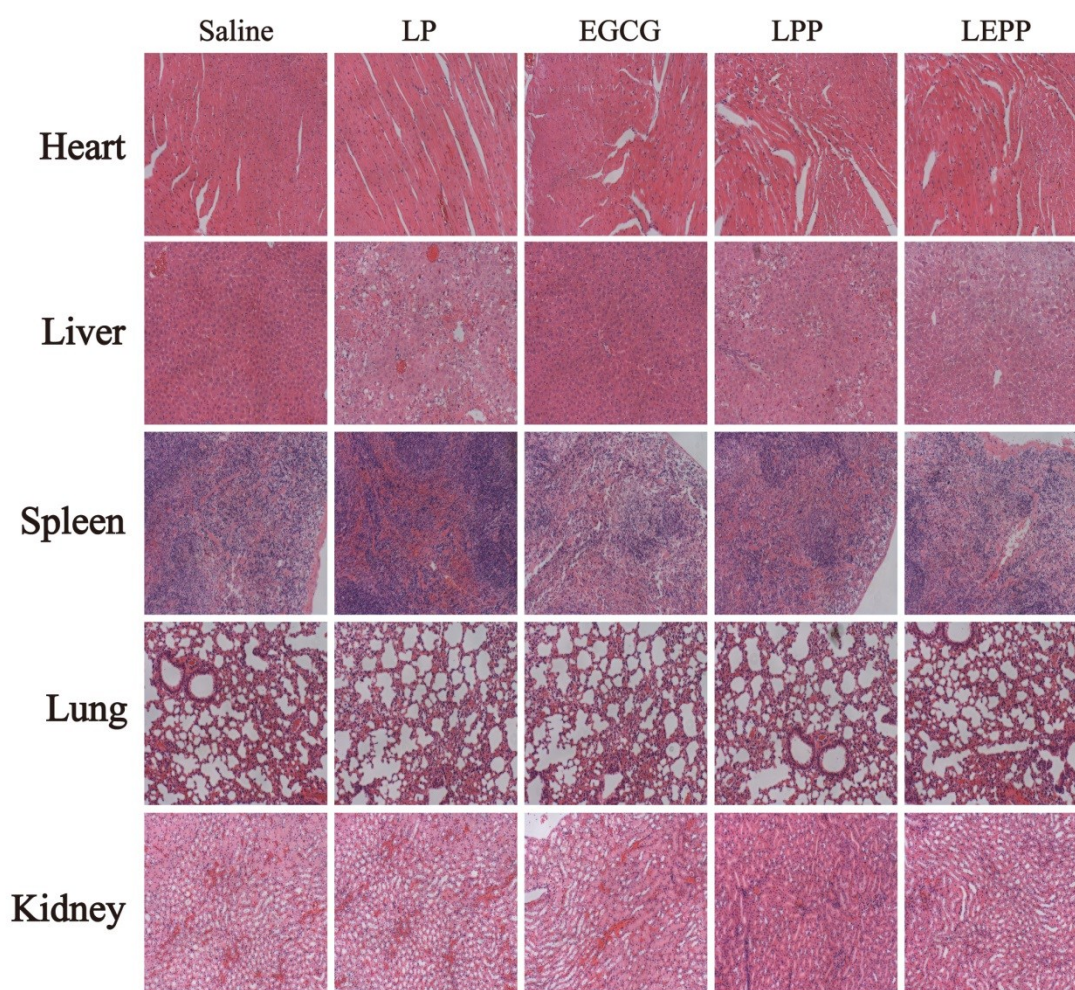

**Figure S9.** Histology analysis of major organs from mice separated with different group treatment.
